# Supplementary material
Source: PubMed Central journal article supplement (PMC5788530)
Supplement: 673FigureS4.pdf [file 673FigureS4.pdf]

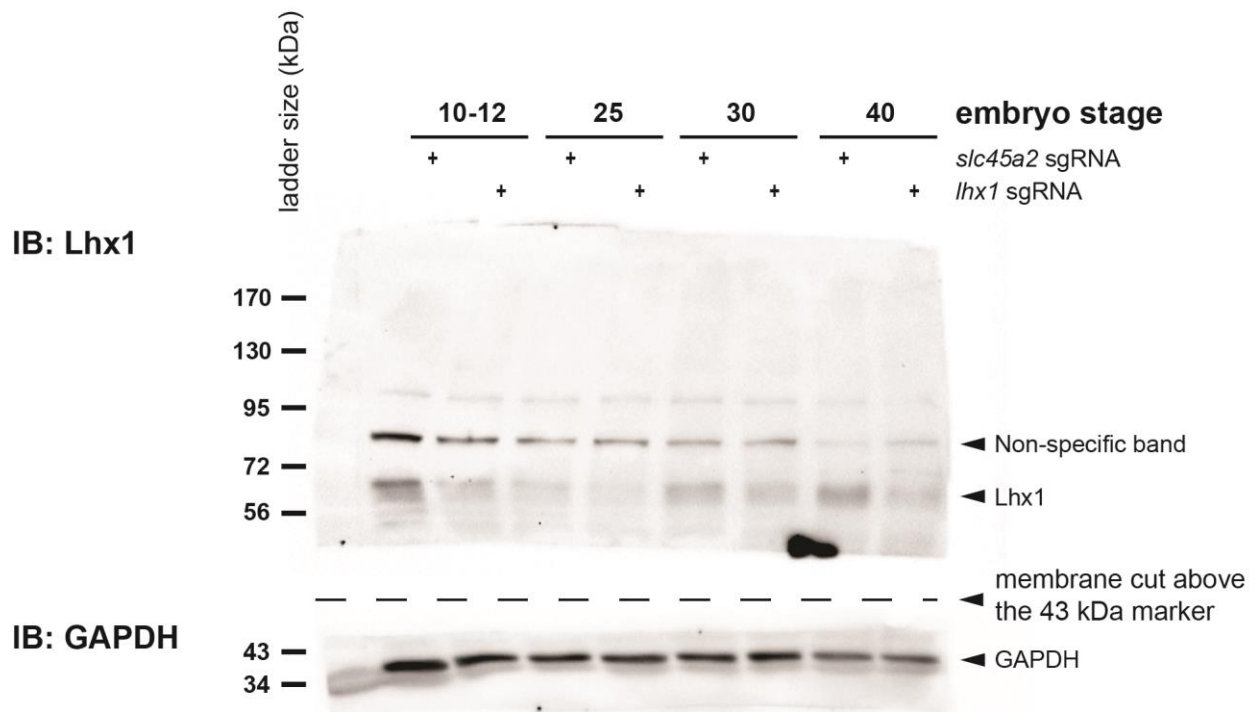

**Figure S4.** Western blot showing loss of Lhx1 upon CRISPR knockout. Complete blot from Figure 7A, showing that Lhx1 protein levels are reduced in *lhx1*-knockout embryos, but not in *slc45a2* knockout controls. The blot membrane was cut just above the 43 kDa marker, and the top of the blot was probed using an anti-rabbit Lhx1 antibody, while the bottom was probed using an anti-rabbit GAPDH antibody as a loading control.
